# Supplementary material for: Hydrophobic confinement modulates thermal stability and assists knotting in the folding of tangled proteins
Source: Royal Society of Chemistry journal article supplement (doi:10.1039/c9cp01701a), 2019-01-01
Supplement: c9cp01701a1.pdf [file c9cp01701a1.pdf]

Supplementary information file for

**Hydrophobic confinement modulates thermal stability  
and assists knotting in the folding of tangled proteins**

João N Especial<sup>1</sup>, Ana Nunes<sup>1,2</sup>, Antonio Rey<sup>3\*</sup> & Patrícia FN Faísca<sup>1,2\*</sup>

<sup>1</sup>Departamento de Física and <sup>2</sup>BioISI - Biosystems and Integrative Sciences Institute,  
Faculdade de Ciências, Universidade de Lisboa,  
Campo Grande, Ed. C8, 1749-016 Lisboa, Portugal

<sup>3</sup>Departamento de Química Física, Facultad de Ciencias Químicas, Universidad  
Complutense, 28940 Madrid, Spain

**Corresponding authors:**

Patrícia F.N. Faísca, Email: pffaisca@fc.ul.pt

Antonio Rey, Email: areygayo@ucm.es

**This file includes:**

Supplementary Figures SI:1-SI:7

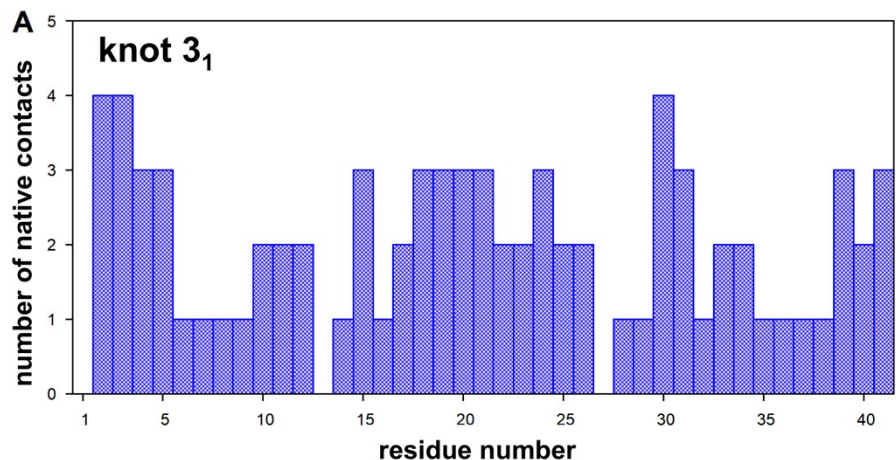

Ctc01

1-2-3-4-5-6-7-8-9-10-11-12-13-14-15-16-17-18-19-20-21-22-23-24-25-26-27-28-29  
-30-31-32-33-34-35-36-37-38-39-40-41

Ctc14

1-2-3-4-5-6-7-8-9-10-11-12-13-14-15-16-17-18-19-20-21-22-23-24-25-26-27-28-29  
-30-31-32-33-34-35-36-37-38-39-40-41

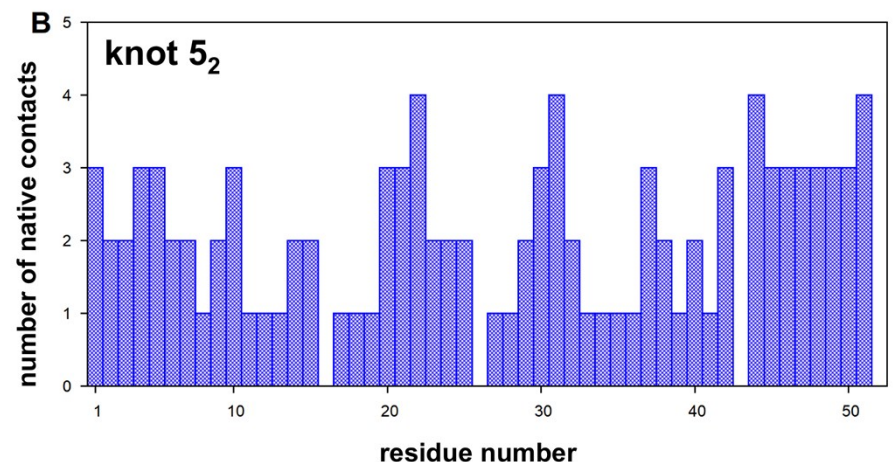

Ctc01

1-2-3-4-5-6-7-8-9-10-11-12-13-14-15-16-17-18-19-20-21-22-23-24-25-26-27-28-29  
-30-31-32-33-34-35-36-37-38-39-40-41-42-43-44-45-46-47-48-49-50-51

Ctc17

1-2-3-4-5-6-7-8-9-10-11-12-13-14-15-16-17-18-19-20-21-22-23-24-25-26-27-28-29  
-30-31-32-33-34-35-36-37-38-39-40-41-42-43-44-45-46-47-48-49-50-51

**SI Figure 1** - Number of native contacts per residue in lattice knot  $3_1$  (A) and lattice knot  $5_2$  (B). The hydrophobic beads are colored red in the designed protein sequences. In sequence Ctc01 the most connected beads (establishing 3 and 4 native contacts) are the ones considered hydrophobic.

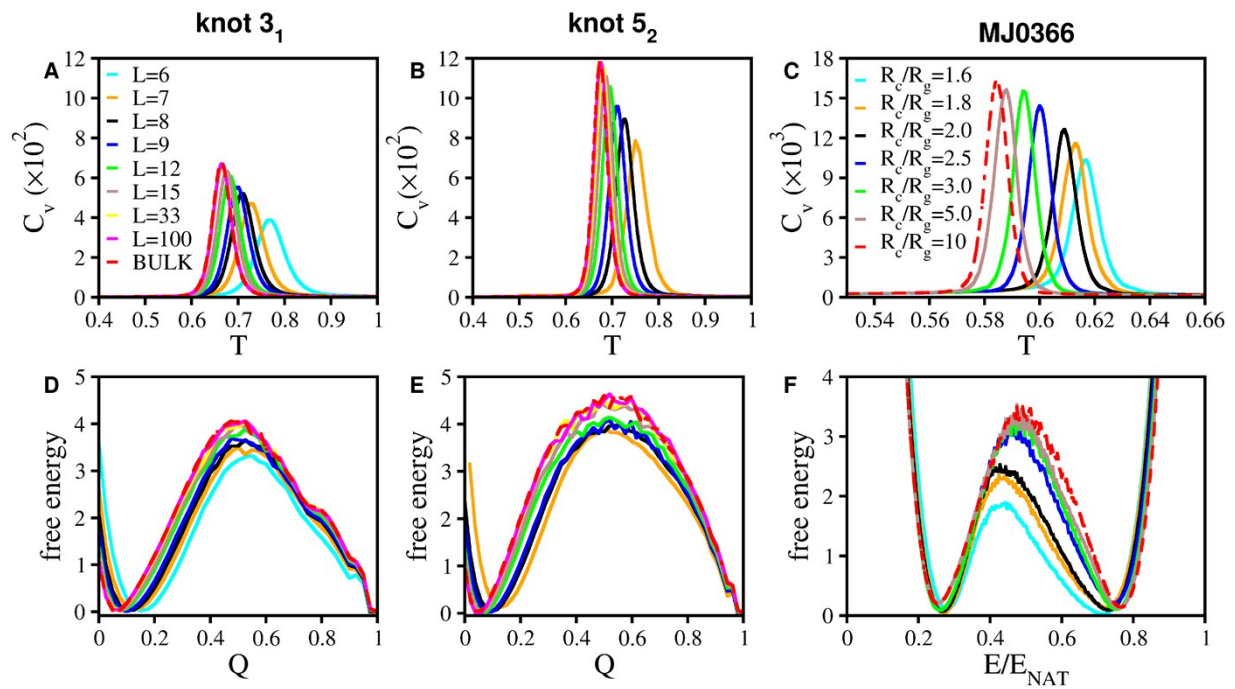

**SI Figure 2 - Folding thermodynamics under steric confinement.** Heat capacity as a function of temperature for knot  $3_1$  (A), knot  $5_2$  (B), and protein MJ0366 (C). The melting temperature  $T_m$  is the temperature at which the  $C_v$  peaks. The projection of the free energy on the selected reaction coordinate at  $T_m$  for knot  $3_1$  (D), knot  $5_2$  (E), and protein MJ0366 (F).

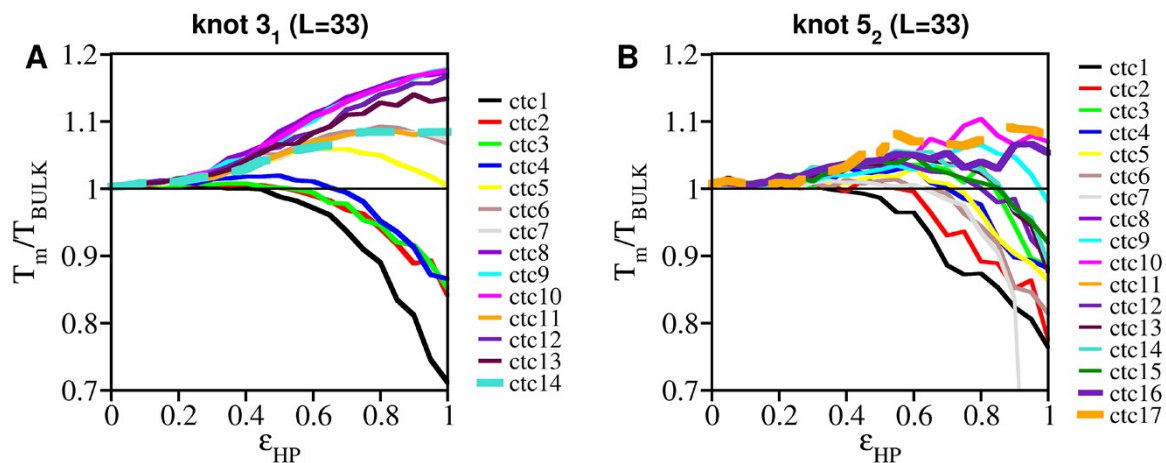

**SI Figure 3** - Thermal stability under hydrophobic confinement. Dependence of the melting temperature,  $T_m$ , (normalized to the melting temperature observed in bulk conditions,  $T_{BULK}$ ) on the hydrophobic intermolecular parameter,  $\epsilon_{HP}$ , for lattice sequence Ctc01 of knot 3<sub>1</sub> (a), sequence Ctc01 of knot 5<sub>2</sub> (b), and protein MJ0366 (C) under different confinement conditions.

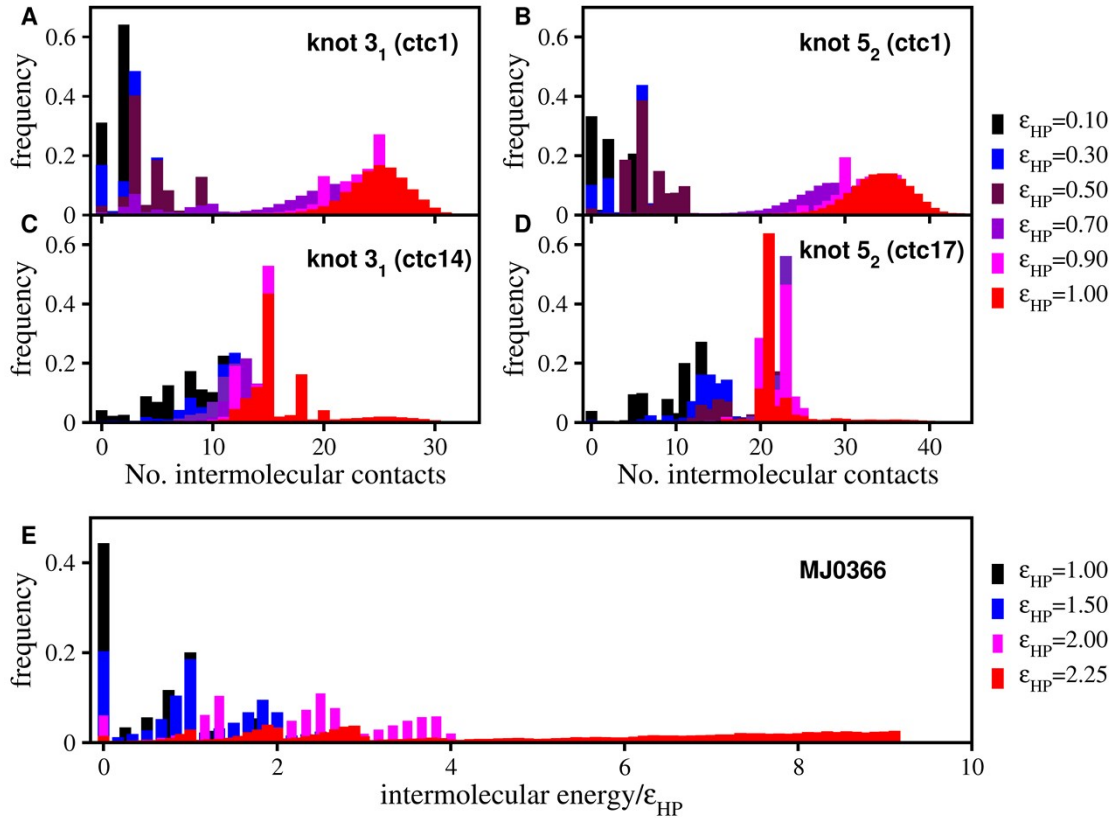

**SI Figure 4 - Distribution of intermolecular interactions.** Probability histograms for the distribution of the number of established intermolecular contacts at fixed temperature ( $T=0.6$ ) for model sequence Ctc01 of lattice knot  $3_1$  (A), sequence Ctc01 of lattice knot  $5_2$  (B), and for sequences ctc14 (knot  $3_1$ ) (C) and ctc17 (knot  $5_2$ ) in a box of size  $L=8$ . The probability histogram for intermolecular energy for protein MJ0366 at fixed temperature ( $T=0.58$ ) in a sphere of radius  $R_c=2R_g$  (E). Depending on  $\epsilon_{HP}$ , the simulation temperature can be above or below  $T_m$  (see main text).

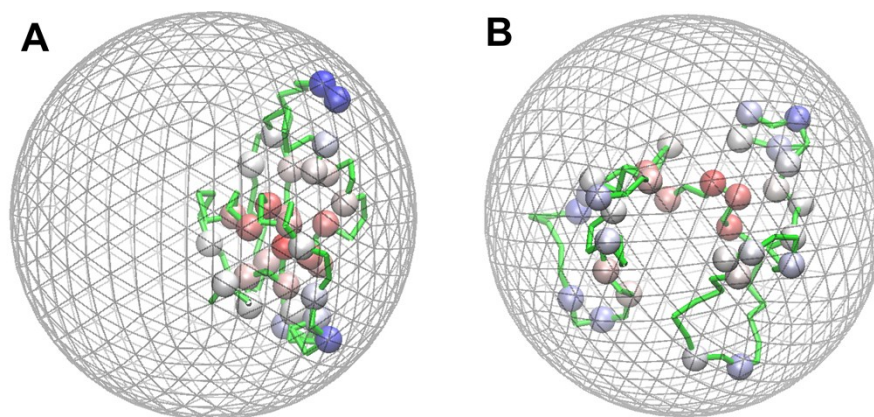

**SI Figure 5 - Conformations populated under hydrophobic confinement.** The confining sphere has radius  $R_C/R_g=2.0$ , and hydrophobic residues are represented as spheres. Residues closer to the cavity's surface are colored in blue while those further away from the surface are colored in white. The conformation (A) is populated at low  $T (< T_m)$  while conformation (B) is populated at high  $T (> T_m)$ .

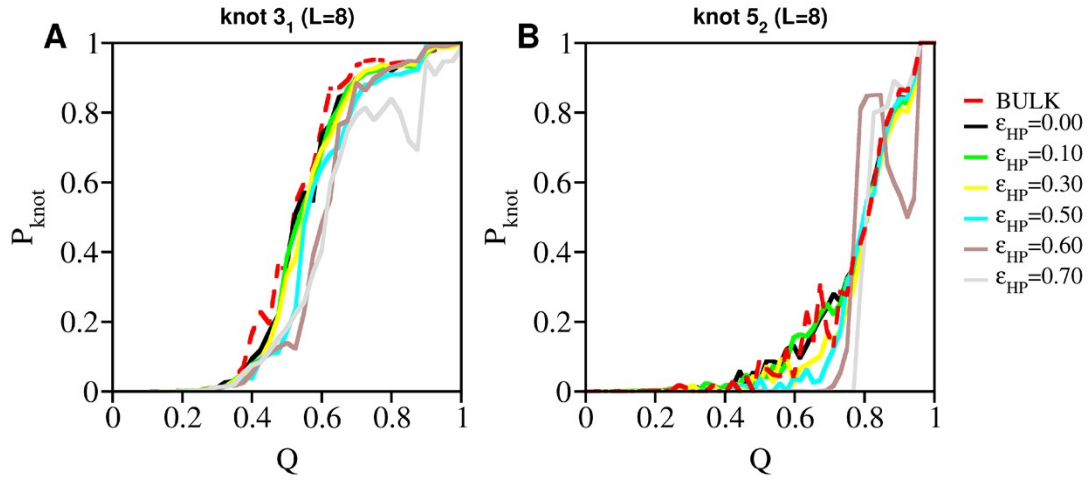

**SI: Figure 6 - Knotting probability of lattice sequence  $\text{ctc0}$  under hydrophobic confinement.** Dependence of  $P_{\text{knot}}$  on the reaction coordinate  $Q$  for knot  $3_1$  (A) and knot  $5_2$  (B), for several strengths of the hydrophobic intermolecular parameter,  $\epsilon_{\text{HP}}$ , in a box of size  $L=8$  at  $T_m$ .



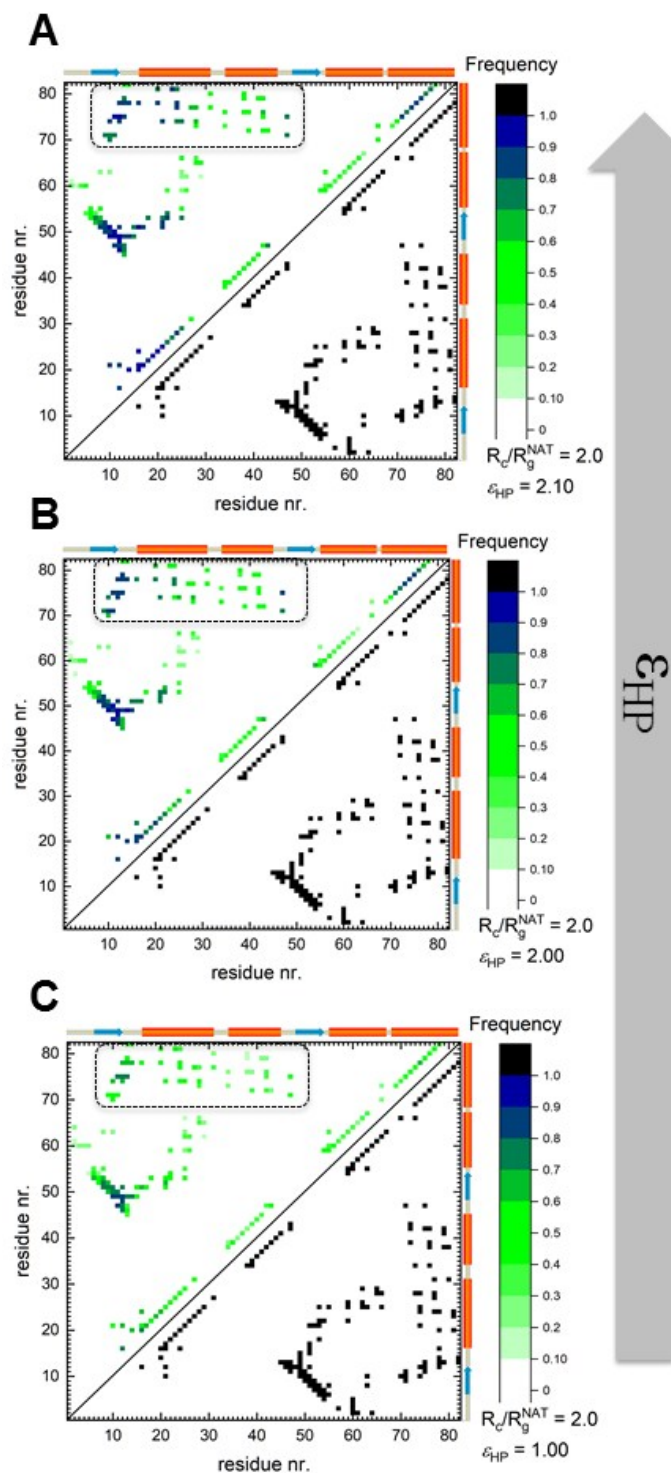

**SI: Figure 7 – Transition state structure.** Effect of the strength of intermolecular interactions with the cavity,  $\epsilon_{HP}$ , on the structure of the transition state ensemble:  $\epsilon_{HP}=2.1$  (A),  $\epsilon_{HP}=2.0$  (B) and  $\epsilon_{HP}=1.0$  (C). The dotted region in the probability (native contact) maps indicate the native contacts establishing between the C-terminal helix 4 and its surroundings. In all cases the  $R_C/R_g=2.0$ .
